# Supplementary material for: Pb3.5GeS4Br3: the first phase-matching thiogermanate halide infrared nonlinear optical material
Source: Royal Society of Chemistry journal article supplement (doi:10.1039/d4qi00293h), 2024-01-01
Supplement: d4qi00293h1.pdf [file d4qi00293h1.pdf]

## Supporting Information

### **Pb<sub>3.5</sub>GeS<sub>4</sub>Br<sub>3</sub>: The first phase-matching thiogermanate halide IR nonlinear optical material**

Jiazheng Zhou,<sup>a,b†</sup> Hongshan Wang,<sup>b†</sup> Junjie Liu,<sup>a†</sup> Xin Su,<sup>b</sup> Yu Chu,<sup>b,\*</sup> Jiale Qu,<sup>a,\*</sup> Xiangzhan Jiang<sup>a,\*</sup>

*a. Institute of Rehabilitation Engineering, Binzhou Medical University, Yantai, 264003, China.*

*b. Research Center for Crystal Materials; State Key Laboratory of Functional Materials and Devices for Special Environmental Conditions; Xinjiang Key Laboratory of Functional Crystal Materials; Xinjiang Technical Institute of Physics & Chemistry, CAS, 40-1 South Beijing Road, Urumqi 830011, China.*

\*Corresponding authors (E-mails: [chuy@ms.xjb.ac.cn](mailto:chuy@ms.xjb.ac.cn); [qujiale@buaa.edu.cn](mailto:qujiale@buaa.edu.cn); [xzjiang@bzmc.edu.cn](mailto:xzjiang@bzmc.edu.cn))

† These authors contributed equally to this work.

**Table S1.** Atomic coordinates, equivalent isotropic displacement parameters ( $\text{\AA}^2 \times 10^3$ ) of  $\text{Pb}_3\text{GeS}_4\text{Br}_2$ .

| Atoms | x          | y          | z          | $U_{\text{eq}}$ | Wyckoff positions |
|-------|------------|------------|------------|-----------------|-------------------|
| Pb1   | 8013.3(4)  | 6928.8(5)  | 6484.4(4)  | 38.56(14)       | 4e                |
| Pb2   | 8459.7(3)  | 2662.5(7)  | 4120.2(5)  | 45.47(15)       | 4e                |
| Pb3   | 5460.9(3)  | -944.2(4)  | 3366.2(4)  | 27.99(12)       | 4e                |
| Ge1   | 6254.4(7)  | 2948.2(10) | 5160.6(8)  | 15.87(18)       | 4e                |
| S1    | 6672.5(17) | 4938(3)    | 4097(2)    | 21.1(4)         | 4e                |
| S2    | 7485.3(18) | 915(3)     | 5463(2)    | 23.5(4)         | 4e                |
| S3    | 4500.7(16) | 1914(2)    | 3982.2(19) | 16.0(4)         | 4e                |
| S4    | 6511(2)    | 3843(3)    | 7074(2)    | 29.0(5)         | 4e                |
| Br1   | 8735.7(10) | 6875.4(15) | 9343.5(10) | 38.8(3)         | 4e                |
| Br2   | 9674.3(8)  | 4356.4(13) | 6993.3(10) | 35.8(2)         | 4e                |

**Table S2.** Atomic coordinates, equivalent isotropic displacement parameters ( $\text{\AA}^2 \times 10^3$ ) of  $\text{Pb}_{3.5}\text{GeS}_4\text{Br}_3$ .

| Atoms | x          | y         | z          | $U_{\text{eq}}$ | Wyckoff positions |
|-------|------------|-----------|------------|-----------------|-------------------|
| Pb1   | 1453.8(3)  | 4040.6(3) | 8784.7(6)  | 24.32(13)       | 6c                |
| Pb2   | 0          | 0         | 1517(2)    | 22.0(2)         | 2a                |
| Ge1   | 3333.33    | 6666.67   | 4759(2)    | 13.0(3)         | 2b                |
| S1    | 3333.33    | 6666.67   | 1140(5)    | 19.0(7)         | 2b                |
| S2    | 1230.4(19) | 6000(2)   | 6184(3)    | 15.4(4)         | 6c                |
| Br1   | 786.3(7)   | 2606.3(7) | 4002.8(15) | 23.33(19)       | 2b                |

**Table S3.** Selected bond lengths of Pb<sub>3</sub>GeS<sub>4</sub>Br<sub>2</sub>.

| Atom | Atom | Length/Å   | Atom | Atom            | Length/Å |
|------|------|------------|------|-----------------|----------|
| Pb1  | S1   | 2.980(2)   | Pb3  | S3 <sup>1</sup> | 3.120(2) |
| Pb1  | Br14 | 3.1346(11) | Pb3  | S1 <sup>2</sup> | 3.030(2) |
| Pb1  | Br1  | 2.9899(11) | Pb3  | S2              | 3.046(2) |
| Pb1  | Br2  | 2.8432(10) | Pb3  | S4 <sup>3</sup> | 2.939(2) |
| Pb2  | S1   | 2.928(2)   | Ge1  | S1              | 2.218(2) |
| Pb2  | S2   | 2.760(2)   | Ge1  | S2              | 2.194(2) |
| Pb2  | S43  | 2.841(2)   | Ge1  | S3              | 2.216(2) |
| Pb3  | S3   | 2.8430(19) | Ge1  | S4              | 2.193(2) |

<sup>1</sup>1-X,-Y,1-Z; <sup>2</sup>1-X,-1/2+Y,1/2-Z; <sup>3</sup>+X,1/2-Y,-1/2+Z; <sup>4</sup>+X,3/2-Y,-1/2+Z

**Table S4.** Selected bond lengths of  $\text{Pb}_{3.5}\text{GeS}_4\text{Br}_3$ .

| Atom | Atom             | Length/Å   | Atom | Atom             | Length/Å   |
|------|------------------|------------|------|------------------|------------|
| Pb1  | S1 <sup>2</sup>  | 2.9490(16) | Pb2  | Br1 <sup>7</sup> | 2.9613(10) |
| Pb1  | S2 <sup>1</sup>  | 2.8960(19) | Pb2  | Br1 <sup>8</sup> | 2.9613(10) |
| Pb1  | S2               | 2.7797(19) | Pb2  | Br1 <sup>4</sup> | 2.9702(11) |
| Pb1  | Br1              | 3.2024(10) | Ge1  | S1               | 2.191(3)   |
| Pb2  | Br1              | 2.9613(10) | Ge1  | S2               | 2.2243(19) |
| Pb2  | Br1 <sup>5</sup> | 2.9702(11) | Ge1  | S2 <sup>1</sup>  | 2.2243(19) |
| Pb2  | Br1 <sup>6</sup> | 2.9702(11) | Ge1  | S2 <sup>9</sup>  | 2.2243(19) |

<sup>1</sup>1-Y,1+X-Y,+Z; <sup>2</sup>+X,+Y,1+Z; <sup>3</sup>-X,-Y,1/2+Z; <sup>4</sup>-X,-Y,-1/2+Z; <sup>5</sup>+Y,-X+Y,-1/2+Z; <sup>6</sup>-Y+X,+X,-1/2+Z; <sup>7</sup>+Y-X,-X,+Z; <sup>8</sup>-Y,+X-Y,+Z; <sup>9</sup>+Y-X,1-X,+Z

**Table S5.** Selected angles (°) of Pb<sub>3</sub>GeS<sub>4</sub>Br<sub>2</sub>.

| Atom            | Atom | Atom             | Angle/°   | Atom            | Atom | Atom            | Angle/°    |
|-----------------|------|------------------|-----------|-----------------|------|-----------------|------------|
| S1              | Pb1  | Br1              | 140.79(5) | S1 <sup>2</sup> | Pb3  | S3 <sup>1</sup> | 125.98(5)  |
| S1              | Pb1  | Br1 <sup>4</sup> | 72.30(5)  | S1 <sup>2</sup> | Pb3  | S2              | 136.75(6)  |
| Br2             | Pb1  | Br1              | 85.53(3)  | S2              | Pb3  | S3 <sup>1</sup> | 73.25(6)   |
| Br2             | Pb1  | Br1 <sup>4</sup> | 86.00(3)  | S4 <sup>3</sup> | Pb3  | S3 <sup>1</sup> | 145.30(6)  |
| Br2             | Pb1  | S1               | 82.80(5)  | S4 <sup>3</sup> | Pb3  | S1 <sup>2</sup> | 79.75(6)   |
| Br1             | Pb1  | Br1 <sup>4</sup> | 143.89(4) | S4 <sup>3</sup> | Pb3  | S2              | 72.16(6)   |
| S2              | Pb2  | S1               | 77.13(6)  | S3              | Ge1  | S1              | 111.29(8)  |
| S2              | Pb2  | S4 <sup>3</sup>  | 78.02(7)  | S2              | Ge1  | S3              | 106.52(8)  |
| S4 <sup>3</sup> | Pb2  | S1               | 81.79(7)  | S2              | Ge1  | S1              | 107.06(9)  |
| S3              | Pb3  | S3 <sup>1</sup>  | 77.44(6)  | S4              | Ge1  | S3              | 113.45(9)  |
| S3              | Pb3  | S1 <sup>2</sup>  | 74.27(6)  | S4              | Ge1  | S1              | 110.33(10) |
| S3              | Pb3  | S2               | 73.68(5)  | S4              | Ge1  | S2              | 107.86(9)  |
| S3              | Pb3  | S4 <sup>3</sup>  | 90.29(7)  |                 |      |                 |            |

<sup>1</sup>1-X,-Y,1-Z; <sup>2</sup>1-X,-1/2+Y,1/2-Z; <sup>3</sup>+X,1/2-Y,-1/2+Z; <sup>4</sup>+X,3/2-Y,-1/2+Z; <sup>5</sup>+X,3/2-Y,1/2+Z; <sup>6</sup>1-X,1/2+Y,1/2-Z; <sup>7</sup>+X,1/2-Y,1/2+Z

**Table S6.** Selected angles (°) of Pb<sub>3,5</sub>GeS<sub>4</sub>Br<sub>3</sub>.

| Atom             | Atom | Atom             | Angle/°   | Atom             | Atom | Atom             | Angle/°   |
|------------------|------|------------------|-----------|------------------|------|------------------|-----------|
| S2               | Pb1  | Br1              | 77.49(4)  | Br1              | Pb2  | Br1 <sup>8</sup> | 83.721(9) |
| S2 <sup>1</sup>  | Pb1  | Br1              | 70.33(4)  | Br1 <sup>7</sup> | Pb2  | Br1 <sup>8</sup> | 179.71(6) |
| S2               | Pb1  | S2 <sup>1</sup>  | 77.43(7)  | Br1 <sup>3</sup> | Pb2  | Br1 <sup>5</sup> | 96.09(4)  |
| S2               | Pb1  | S1 <sup>2</sup>  | 78.67(6)  | Br1 <sup>6</sup> | Pb2  | Br1 <sup>3</sup> | 83.722(9) |
| S2 <sup>1</sup>  | Pb1  | S1 <sup>2</sup>  | 76.87(6)  | Br1 <sup>5</sup> | Pb2  | Br1 <sup>8</sup> | 96.09(4)  |
| S1 <sup>2</sup>  | Pb1  | Br1              | 142.78(6) | Br1 <sup>7</sup> | Pb2  | Br1 <sup>3</sup> | 83.722(9) |
| Br1 <sup>3</sup> | Pb2  | Br1 <sup>8</sup> | 96.09(4)  | Br1              | Pb2  | Br1 <sup>5</sup> | 83.721(9) |
| Br1              | Pb2  | Br1 <sup>3</sup> | 179.71(6) | S2               | Ge1  | S2 <sup>1</sup>  | 105.93(6) |
| Br1 <sup>6</sup> | Pb2  | Br1 <sup>8</sup> | 83.722(9) | S2 <sup>9</sup>  | Ge1  | S2 <sup>1</sup>  | 105.93(6) |
| Br1 <sup>6</sup> | Pb2  | Br1 <sup>7</sup> | 96.47(4)  | S2               | Ge1  | S2 <sup>9</sup>  | 105.93(6) |
| Br1 <sup>6</sup> | Pb2  | Br1 <sup>5</sup> | 179.71(6) | S1               | Ge1  | S2 <sup>1</sup>  | 112.82(6) |
| Br1 <sup>7</sup> | Pb2  | Br1 <sup>5</sup> | 83.722(9) | S1               | Ge1  | S2 <sup>9</sup>  | 112.82(6) |
| Br1 <sup>6</sup> | Pb2  | Br1              | 96.47(4)  | S1               | Ge1  | S2               | 112.82(6) |
| Br1 <sup>7</sup> | Pb2  | Br1              | 96.47(4)  |                  |      |                  |           |

<sup>1</sup>1-Y,1+X-Y,+Z; <sup>2</sup>+X,+Y,1+Z; <sup>3</sup>-X,-Y,-1/2+Z; <sup>4</sup>-X,-Y,1/2+Z; <sup>5</sup>-Y+X,+X,-1/2+Z; <sup>6</sup>+Y-X,-X,+Z; <sup>7</sup>-Y,+X-Y,+Z; <sup>8</sup>+Y,-X+Y,-1/2+Z; <sup>9</sup>+Y-X,1-X,+Z; <sup>10</sup>+Y-X,1-X,-1+Z; <sup>11</sup>+X,+Y,-1+Z; <sup>12</sup>1-Y,1+X-Y,-1+Z

**Table S7.** Anisotropic displacement parameters ( $\text{\AA}^2 \times 10^3$ ) for  $\text{Pb}_3\text{GeS}_4\text{Br}_2$ . The anisotropic displacement factor exponent takes the form:  $-2\pi^2[h^2a^{*2}U_{11}+2hka^*b^*U_{12}+\dots]$ .

| Atom | $U_{11}$ | $U_{22}$  | $U_{33}$ | $U_{23}$  | $U_{13}$  | $U_{12}$   |
|------|----------|-----------|----------|-----------|-----------|------------|
| Pb1  | 38.5(2)  | 48.7(3)   | 25.6(2)  | -1.34(16) | 11.60(17) | 18.96(17)  |
| Pb2  | 25.7(2)  | 74.7(3)   | 40.7(3)  | -11.1(2)  | 18.88(18) | -10.34(18) |
| Pb3  | 34.3(2)  | 26.06(19) | 27.5(2)  | 2.63(13)  | 17.18(16) | 2.76(13)   |
| Ge1  | 18.0(4)  | 18.3(4)   | 11.6(4)  | 0.2(3)    | 6.8(3)    | 0.2(3)     |
| S1   | 21.1(9)  | 21.9(9)   | 16.8(10) | 3.5(7)    | 5.3(7)    | -2.0(7)    |
| S2   | 20.2(9)  | 20.8(9)   | 26.7(11) | 2.2(8)    | 7.7(8)    | 5.2(7)     |
| S3   | 16.0(8)  | 18.8(9)   | 13.6(9)  | -0.3(7)   | 6.9(7)    | -0.1(6)    |
| S4   | 30.1(11) | 41.1(13)  | 11.7(10) | -4.4(8)   | 5.5(8)    | 15.7(9)    |
| Br1  | 41.3(5)  | 59.5(7)   | 23.3(5)  | -6.7(4)   | 21.2(4)   | -14.9(5)   |
| Br2  | 26.1(4)  | 36.5(5)   | 31.0(5)  | -9.8(4)   | 0.0(4)    | 11.4(4)    |



**Table S8.** Anisotropic displacement parameters ( $\text{\AA}^2 \times 10^3$ ) for  $\text{Pb}_{3.5}\text{GeS}_4\text{Br}_3$ . The anisotropic displacement factor exponent takes the form:  $-2\pi^2[h^2a^2U_{11}+2hka^*b^*U_{12}+\dots]$ .

| Atom | U11       | U22       | U33       | U23      | U13      | U12       |
|------|-----------|-----------|-----------|----------|----------|-----------|
| Pb1  | 27.61(19) | 21.53(18) | 23.92(19) | 4.86(17) | 1.42(18) | 12.36(13) |
| Pb2  | 17.6(3)   | 17.6(3)   | 30.9(6)   | 0        | 0        | 8.78(14)  |
| Ge1  | 14.3(4)   | 14.3(4)   | 10.4(6)   | 0        | 0        | 7.1(2)    |
| S1   | 23.3(11)  | 23.3(11)  | 10.5(17)  | 0        | 0        | 11.7(6)   |
| S2   | 13.5(9)   | 16.6(10)  | 16.7(10)  | -0.3(8)  | 0.4(7)   | 7.9(8)    |
| Br1  | 22.3(4)   | 24.0(4)   | 21.5(4)   | -2.1(4)  | -4.3(4)  | 10.0(3)   |

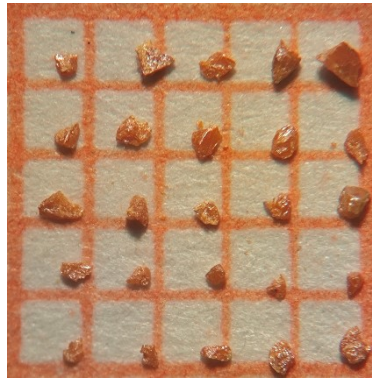

Fig. S1 The optical image of  $\text{Pb}_{3.5}\text{GeS}_4\text{Br}_3$  crystals.

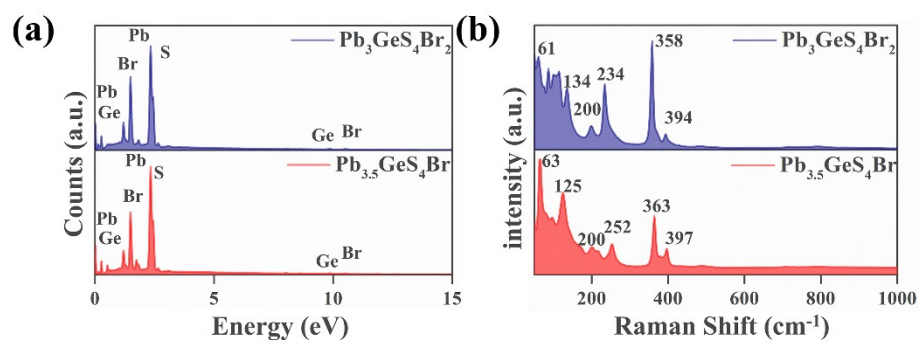

Fig. S2 The EDS (a) and Raman spectra (b) of  $\text{Pb}_3\text{GeS}_4\text{Br}_2$  and  $\text{Pb}_{3.5}\text{GeS}_4\text{Br}_3$ .

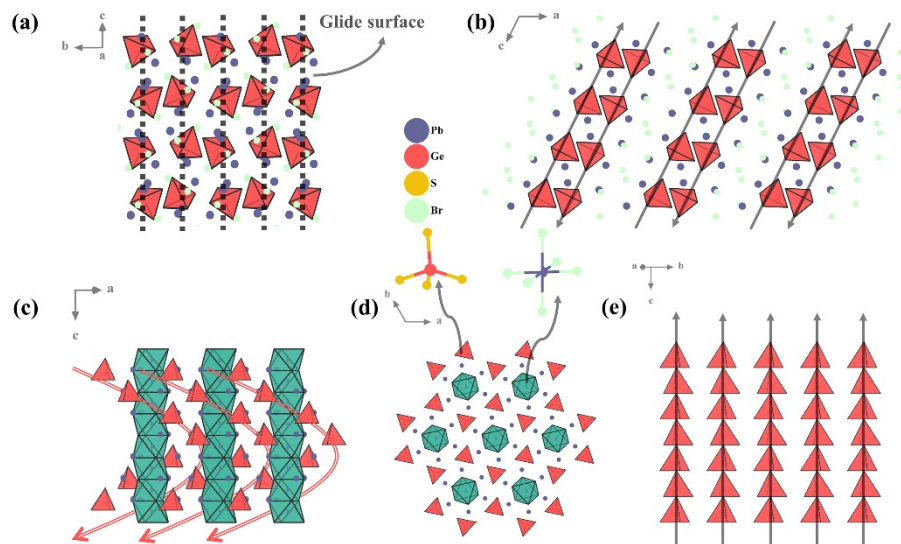

Fig. S3 The structures of  $\text{Pb}_3\text{GeS}_4\text{Br}_2$  and  $\text{Pb}_{3.5}\text{GeS}_4\text{Br}_3$ . (a) The isolated  $[\text{GeS}_4]$  pseudo-layer structure alignment along the glide surface in  $\text{Pb}_3\text{GeS}_4\text{Br}_2$ ; (b) The opposite-arranged  $[\text{GeS}_4]$  tetrahedra in  $\text{Pb}_3\text{GeS}_4\text{Br}_2$ ; (c) The isolated  $[\text{GeS}_4]$  tetrahedral arranged around the  $[\text{PbS}_6]$  column configuration in  $\text{Pb}_{3.5}\text{GeS}_4\text{Br}_3$ ; (d) The whole structure of  $\text{Pb}_{3.5}\text{GeS}_4\text{Br}_3$ ; (e) The well-arranged  $[\text{GeS}_4]$  tetrahedra in  $\text{Pb}_{3.5}\text{GeS}_4\text{Br}_3$ .

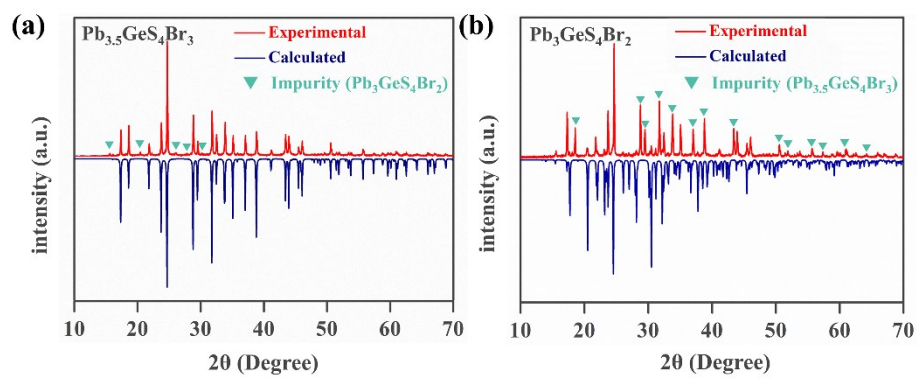

Fig. S4 The experimental and calculated XRD patterns of  $\text{Pb}_{3.5}\text{GeS}_4\text{Br}_3$  (a) and  $\text{Pb}_3\text{GeS}_4\text{Br}_2$  (b).

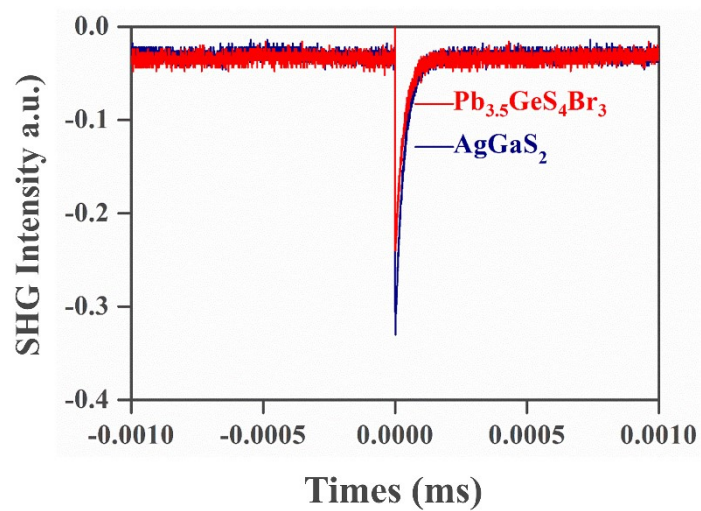

Fig. S5 Oscilloscope traces of SHG signals of  $\text{Pb}_{3.5}\text{GeS}_4\text{Br}_3$  (red) with  $\text{AgGaS}_2$  (blue) as a reference at a particle size of 180-212  $\mu\text{m}$ .

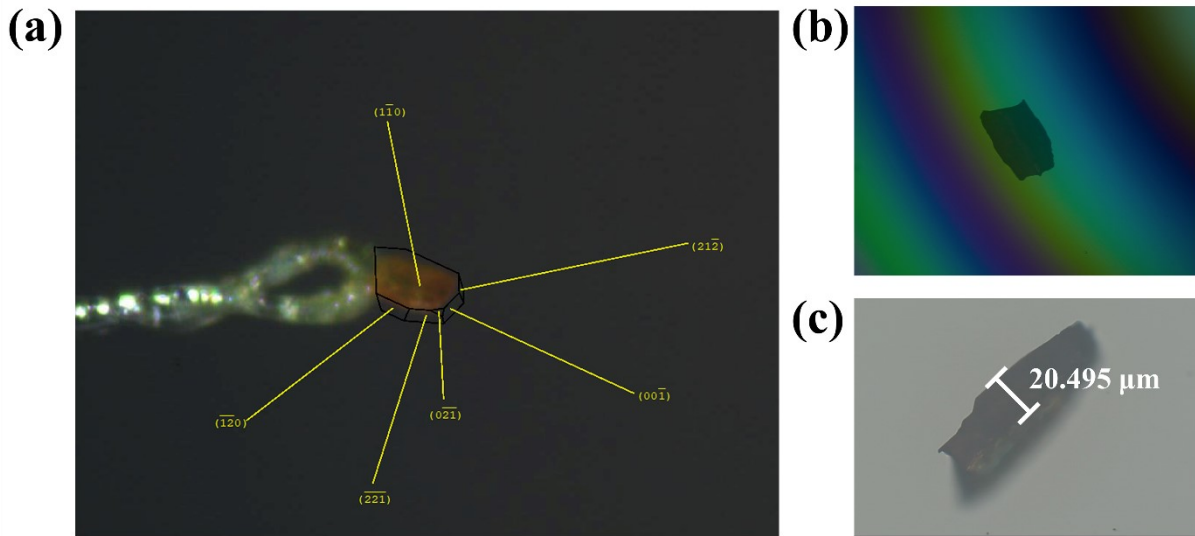

Fig. S6 The RID measurement of  $\text{Pb}_{3.5}\text{GeS}_4\text{Br}_3$ . (a) The plane indices determined by single crystal XRD. (b) The RID was measured to  $0.05@546 \text{ nm}$  (c) The thickness of the single crystal is  $20.495 \mu\text{m}$  measured by an optical microscope.

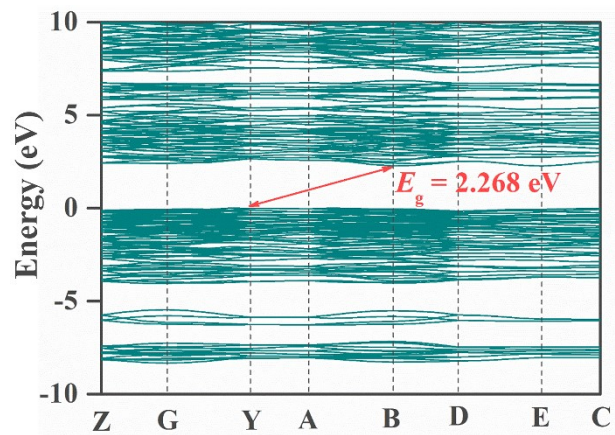

Fig. S7 The band structure of  $\text{Pb}_3\text{GeS}_4\text{Br}_2$ .
